# Supplementary material for: A Global Risk Score (GRS) to Simultaneously Predict Early and Late Tumor Recurrence Risk after Resection of Hepatocellular Carcinoma
Source: PubMed Central journal article supplement — Transl Oncol. 2016 Apr 12;9(2):139–46. doi: 10.1016/j.tranon.2016.02.003 (PMC4833966; doi:10.1016/j.tranon.2016.02.003), 2016-04-12
Supplement: mmc1.pdf [file mmc1.pdf]

## Original article

# A Global Risk Score (GRS) to simultaneously predict early and late tumor recurrence risk after resection of hepatocellular carcinoma

J. Dekervel<sup>a</sup>, D. Popovic<sup>b</sup>, H. van Malenstein<sup>a</sup>, P. Windmolders<sup>a</sup>, L. Heylen<sup>c</sup>, L. Libbrecht<sup>a,d</sup>, A. Bulle<sup>a</sup>, B. De Moor<sup>b</sup>, E. Van Cutsem<sup>e</sup>, F. Nevens<sup>a</sup>, C. Verslype<sup>a,e</sup> and J. van Pelt<sup>\*a</sup>

- a. Laboratory of Hepatology, Department of Clinical and Experimental Medicine, University Hospitals Leuven & KU Leuven, Herestraat 49, 3000 Leuven, Belgium
- b. Department of Electrical Engineering (ESAT), STADIUS Center for Dynamical Systems, Signal Processing and Data Analytics / iMinds Medical IT, KU Leuven, Kasteelpark Arenberg 10, 3000 Leuven, Belgium
- c. Department of Nephrology and Renal Transplantation, University Hospitals Leuven & Department of Microbiology and Immunology, KU Leuven, Herestraat 49, 3000 Leuven, Belgium
- d. Department of Pathology, University Hospital Ghent, De Pintelaan 185, 9000 Ghent, Belgium
- e. Department of Clinical Digestive Oncology, University Hospitals Leuven, Herestraat 49, 3000 Leuven, Belgium

### **\*Corresponding author & requests for reprints:**

Prof Dr Ing Jos van Pelt  
Laboratory of Hepatology, Department of Clinical and Experimental Medicine,  
University Hospitals Leuven & KU Leuven  
O&N1, bus 703, Herestraat 49,  
3000 Leuven  
Belgium  
Telephone: 003216330694  
E-mail: [jos.vanpelt@med.kuleuven.be](mailto:jos.vanpelt@med.kuleuven.be)

## Supplementary data

**Suppl Fig. 1. Selected top-ranked enrichment plots using Gene Set Enrichment Analysis of the differentially expressed genes between HepG2S1 and HepG2 cells.** A-D: Loss of hepatocyte specific markers and functions in HepG2S1 cells compared to HepG2. E-G: Enrichment of poor prognostic molecular subclasses of HCC in HepG2S1 cells (see also supplementary table 1).

**Suppl Fig. 2. Overlap between the Global Recurrence Score and the most relevant published signatures derived from the non-tumoral surrounding liver:** the hepatic injury signature of 233 genes (Kim et al. [14]) and the 186 gene signature (Hoshida et al. [13])

**Supplementary table 1.** Overview off all significant gene sets enriched by the Gene Set Enrichment Analysis using all gene sets in the MSig database.

**Supplementary table 2.** Uni- and multivariable Cox regression analysis on known clinical variables in the NCI data set. Global Risk Score groups: GRS I = low GRS in tumor and liver; GRS II = low GRS in tumor, high in liver; GRS III = high GRS in tumor, low in liver; GRS IV = high GRS in tumor and liver.

# Supplementary figure 1

**A**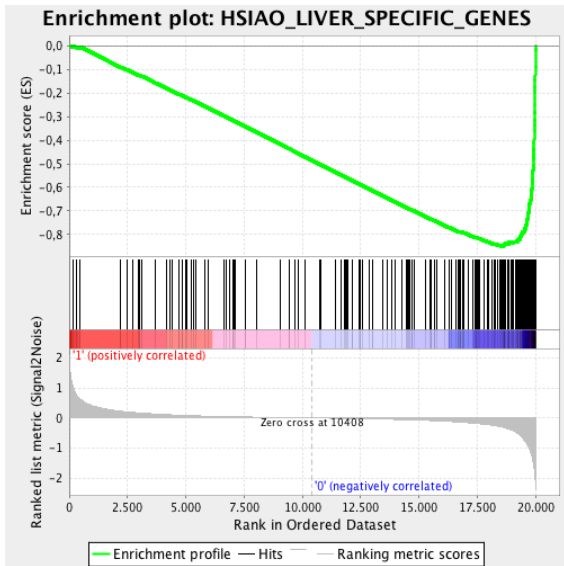**B**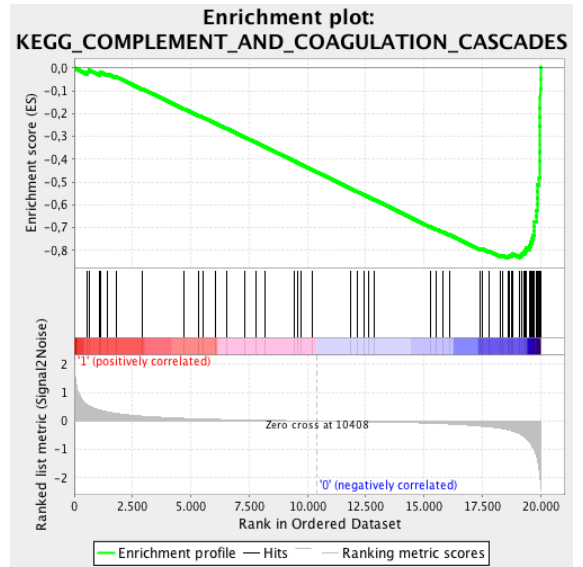**C**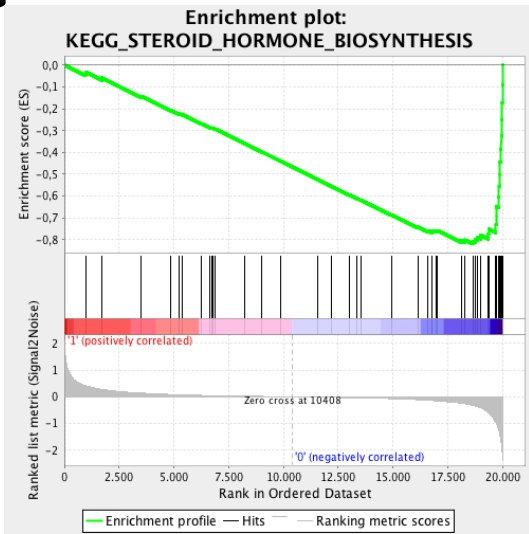**D**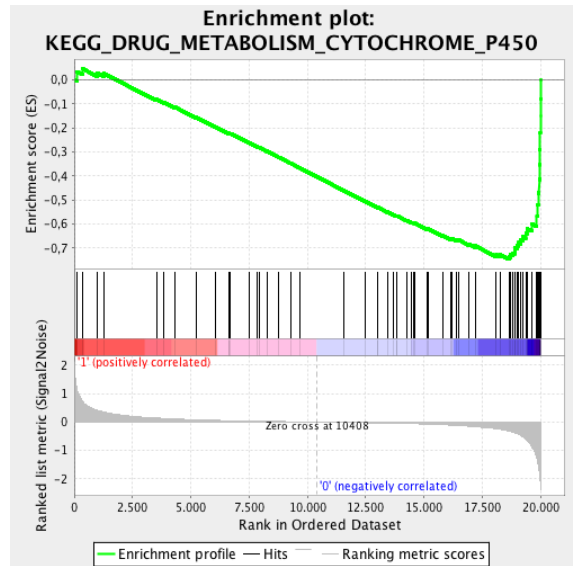

**E**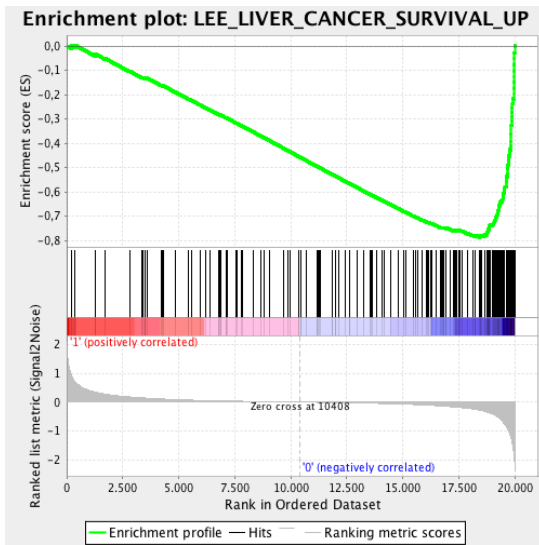**F**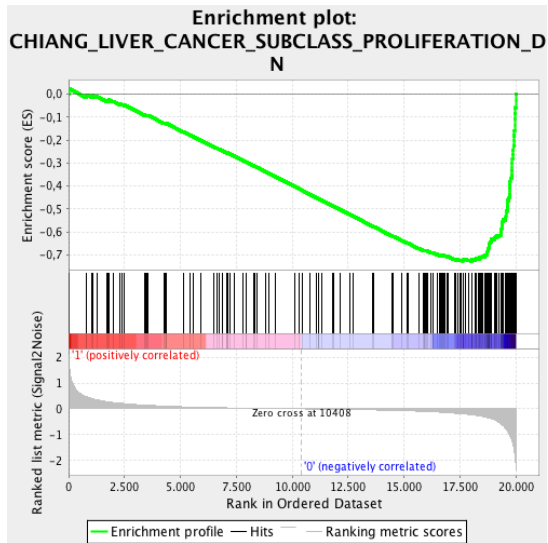**G**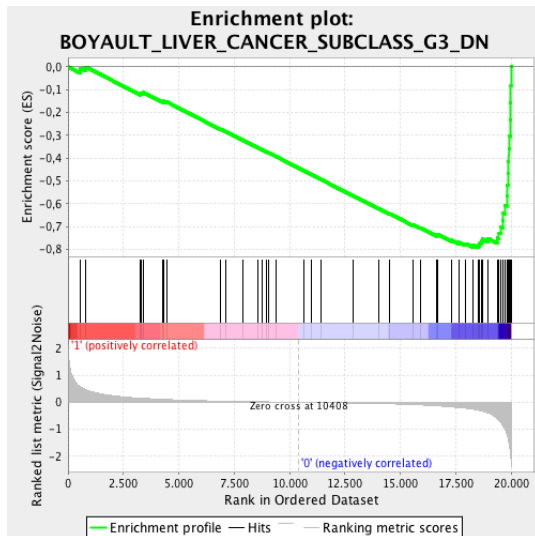

## Supplementary figure 2

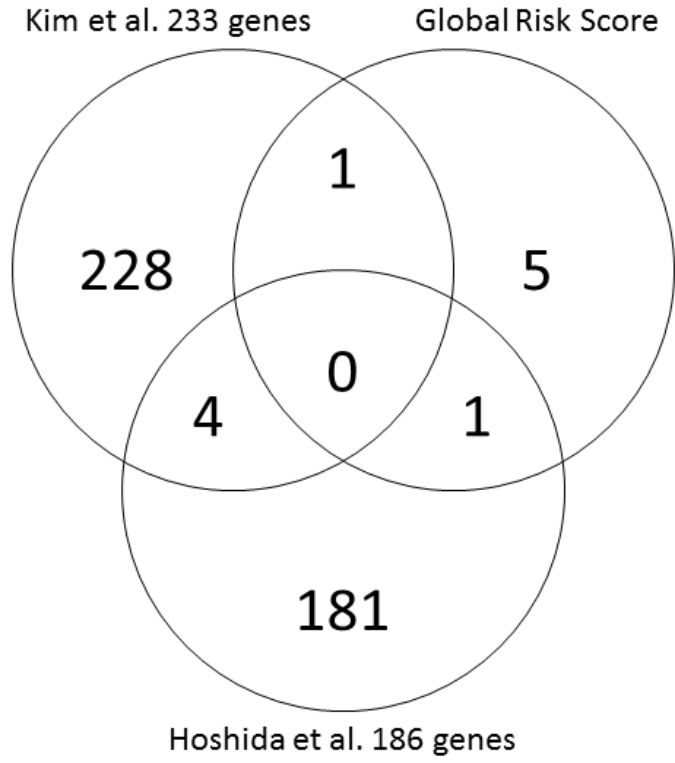

| Gene Signatures                                  | # genes | Genes                                                                                                                                                                                                                                                                                                                                                                                                                                                                                                                                                                                                                                                                                                                                                                                                                                                                                                                                                                                                                                                                                                                                                                                                                                                                                                                                                                                                                                                                                                                                                                                |
|--------------------------------------------------|---------|--------------------------------------------------------------------------------------------------------------------------------------------------------------------------------------------------------------------------------------------------------------------------------------------------------------------------------------------------------------------------------------------------------------------------------------------------------------------------------------------------------------------------------------------------------------------------------------------------------------------------------------------------------------------------------------------------------------------------------------------------------------------------------------------------------------------------------------------------------------------------------------------------------------------------------------------------------------------------------------------------------------------------------------------------------------------------------------------------------------------------------------------------------------------------------------------------------------------------------------------------------------------------------------------------------------------------------------------------------------------------------------------------------------------------------------------------------------------------------------------------------------------------------------------------------------------------------------|
| GlobalRisk ScoreAND Kim et al. 233 genes         | 1       | F11                                                                                                                                                                                                                                                                                                                                                                                                                                                                                                                                                                                                                                                                                                                                                                                                                                                                                                                                                                                                                                                                                                                                                                                                                                                                                                                                                                                                                                                                                                                                                                                  |
| Hoshida et al. 186 genesAND Kim et al. 233 genes | 4       | IER3 SERPINB8 TSC22D2 DUSP5                                                                                                                                                                                                                                                                                                                                                                                                                                                                                                                                                                                                                                                                                                                                                                                                                                                                                                                                                                                                                                                                                                                                                                                                                                                                                                                                                                                                                                                                                                                                                          |
| GlobalRisk ScoreAND Hoshida et al. 186 genes     | 1       | GCKR                                                                                                                                                                                                                                                                                                                                                                                                                                                                                                                                                                                                                                                                                                                                                                                                                                                                                                                                                                                                                                                                                                                                                                                                                                                                                                                                                                                                                                                                                                                                                                                 |
| Kim et al. 233 genes                             | 228     | EMP1 B3GNT5 RGS2 ZNF295 LOC151438 LOC387763 CDC37L1 SERPINE1 VCAN ZFP62 TGIF1 FOSL2 NUFIP2 CDK6 ZNF84 CEBPD PPP1R15A LOC254128 C14orf43 TM4SF1 H3F3A JUND ZFP36 NHSL1 C2orf68 ZC3H12A PRKAB2 NIP7 RTP3 TIA1 LOC653506 SOD2 PTPN1 WWC1 C14orf139 JMJD3 MREG IRF1 LDLR CDKN1A PRUNE MPHOSPH9 SLC2A14 KLF2 KLF15 SGK1 SDC4 GIMAP8 TBC1D13 SPSB1 PLK2 HSPA1B LOC729082 FAM168A USP36 TSC22D1 KIAA1949 NAMPT ERCC4 MAP1LC3B RPL37A NOLC1 CCN1 DUSP6 TGFβ3 C9orf21 SERTAD1 C5AR1 SNIP1 TNFRSF1A PTPRJ C6orf130 GPR183 ADM CCL20 EPHA2 ADAMTS1 JMJD6 TJP2 MXD1 IDH1 PLK3 CBX1 ATF3 GLIPR2 ITPKC YRDC PTPRF ADO STK17A BCL3 ZBTB44 SERPINB9 RIPK4 FAM46C RP5-1022P6.2 EIF4A1 BAG3 TNKS C13orf15 RSC1A1 CCL4 FAM82A1 ARL5B DCUN1D1 FUJ36031 PURA F11R RLIM PLEKHO2 SERPINB1 FAM46A ZNF226 ALB C16orf70 JUNB PIM3 TIPARP IL15RA PNRC1 MDM1 KIAA0146 SRGN CSNK1D SLC2A3 ZKSCAN1 MAP3K14 SLC40A1 AKAP12 MAFK RALGDS LRRC37A2 FCN1 NCOA7 BCL6 ELF3 C14orf132 GOS2 TRAF4 EHD4 SLC20A1 AGPAT3 GRAMD4 MAP1LC3B2 CDC42EP1 CASP4 B4GALT5 CYP4A11 ICAM1 MYC THBS1 JUN PELI1 DHODH SOCS3 MAPRE1 JOSD1 PHLDA1 ETS2 PLAUR MAP2K3 RND1 ARID5B ARL4C CMTM4 ZNF573 NCRNA00087 TNFRSF12A GNA13 C5orf54 MAFF ZNF658 SGMS2 TNFAIP3 C5orf53 UBE4B CCRN4L MCL1 CBR4 KRT18 RASD1 TNFRSF10D FOSL1 SOCS1 BHLHE40 TMEM49 LOC100130097 PGPEP1 SPRY2 C7orf40 ZNF260 IL1RL1 CCDC93 NXT1 DDX21 NOP58 BTG3 PHLDA2 LOC400657 RIPK2 CREM TEF C15orf40 ZNF410 HIF1AN WEE1 NR2F2 WTAP ARHGGEF5 C14orf101 GADD45B C1orf25 ZFP36L2 AXUD1 IL1RN ODC1 S100A10 COQ10B MYADM PIM1 MS4A6A ZBTB43 PPRC1 SENP5 BIRC3 FPR1 FAM60A KLHDC10 |
| GlobalRisk Score                                 | 5       | OXCT1 COL4A2 LRRC16A ATP11C PCSK6                                                                                                                                                                                                                                                                                                                                                                                                                                                                                                                                                                                                                                                                                                                                                                                                                                                                                                                                                                                                                                                                                                                                                                                                                                                                                                                                                                                                                                                                                                                                                    |
| Hoshida et al. 186 genes                         | 181     | HMGCR FSHB TM7SF2 ERCC5 SDHC CCL21 NCAPH LPP SLC37A4 PLG ART1 ACOT2 ZNF185 ATP6A2 COL4A1 RNASE1 CXCR4 CCDC6 POLRMT NOL7 IGF1 SERPINB2 NENF CTNND2 ADD3 ANXA1 SFRS2 MMP7 TRIO PFKFB1 PON3 RBM34 PTPN18 AKAP13 HMG20B C5 EGF ANKRD46 HAAO DAB2 TRAF6 RFC2 ATP5D SLC7A1 PLCG2 LIPC CUTL2 EIF2B1 CPOX TTR PCYT2 IMPA1 RPS6KA5 ITGA9 CHSY1 FAM129A INSM1 DAD1 CPN1 RAD52 SLIT3 CHERP SP100 ACSM3 GSTM1 TAF1C COL6A3 LOXL2 HRASLS3 ANXA3 PPP1R1A TNK2 CYP2B6 ADRA2B ASAH1 SC5DL PCK1 MGC29506 GHR C8B CCL19 C4BPB GCGR WIPF1 ADH6 USP14 MSH6 EMP2 IGFBP6 PSMB3 CREB1 TGFB1I1 TDO2 GJB1 SH3GL2 BRP44 IQGAP1 TXN2 ADH5 EMD DDR1 GBA PMM1 PODXL NFKB2 GPX2 BCL2 XPA PKLR AKR1D1 GRM5 CYB5A PRKG2 ARF4 AKR1A1 IFI30 AP1B1 PROS1 SREBF2 EDG4 NARS2 DOCK4 CPA3 CCT8 ELOVL2 F9 NTS PLCB3 AEBP1 PIGK FMO1 FBN1 DLGAP4 CALCR HMGL AR SLC4A4 CTBS SCG5 HSPE1 KCNJ3 EPM2AIP1 ATP4B AOX1 ALAS1 TMEM97 SELENBP1 EPHA4 ALDH9A1 VPS41 BAIAP2 GGCX WDR23 AARS TCF4 SNX10 ATP2C1 HABP2 PTPN2 DST COL16A1 SLC12A2 ABILM1 HDAC9 CD48 SSFA2 NOS2A ZBTB17 C9 ZER1 TEAD4 GRK4 PSMB9 ICK RRM1 TIMM8A KRT7 ACTR2 SUCLG1 RLF FILIP1L                                                                                                                                                                                                                                                                                                                                                                                                                                                                                |

**Supplementary table 1.** Overview off all significant gene sets enriched by the Gene Set Enrichment Analysis using all gene sets in the MSig database.

| NAME                                               | SIZE | ES          | NES        | NOM p-val | FDR q-val | FWER p-val | RANK AT MAX | LEADING EDGE                   |
|----------------------------------------------------|------|-------------|------------|-----------|-----------|------------|-------------|--------------------------------|
| HSIAO_LIVER_SPECIFIC_GENES                         | 240  | -0,85035366 | -2,838637  | 0         | 0         | 0          | 1377        | tags=53%, list=7%, signal=56%  |
| GNF2_HPX                                           | 133  | -0,8692438  | -2,7082028 | 0         | 0         | 0          | 1420        | tags=62%, list=7%, signal=66%  |
| GNF2_HPN                                           | 131  | -0,85049784 | -2,647056  | 0         | 0         | 0          | 1420        | tags=58%, list=7%, signal=62%  |
| GNF2_LCAT                                          | 122  | -0,85488456 | -2,642469  | 0         | 0         | 0          | 1420        | tags=60%, list=7%, signal=64%  |
| GNF2_GSTM1                                         | 107  | -0,85367393 | -2,613708  | 0         | 0         | 0          | 1498        | tags=60%, list=7%, signal=64%  |
| GNF2_TST                                           | 102  | -0,847545   | -2,5667343 | 0         | 0         | 0          | 1420        | tags=58%, list=7%, signal=62%  |
| CAR_HPX                                            | 73   | -0,88122684 | -2,5552695 | 0         | 0         | 0          | 687         | tags=55%, list=3%, signal=57%  |
| LEE_LIVER_CANCER_SURVIVAL_UP                       | 176  | -0,78775233 | -2,553504  | 0         | 0         | 0          | 1566        | tags=43%, list=8%, signal=46%  |
| OHGUCHI_LIVER_HNF4A_TARGETS_DN                     | 145  | -0,7831885  | -2,4633949 | 0         | 0         | 0          | 1420        | tags=43%, list=7%, signal=46%  |
| MODULE_24                                          | 442  | -0,6853321  | -2,4168966 | 0         | 0         | 0          | 2080        | tags=38%, list=10%, signal=41% |
| CAIRO_LIVER_DEVELOPMENT_DN                         | 222  | -0,72469515 | -2,4024942 | 0         | 0         | 0          | 1399        | tags=37%, list=7%, signal=39%  |
| GNF2_CEBPA                                         | 64   | -0,84795237 | -2,3736157 | 0         | 0         | 0          | 1402        | tags=53%, list=7%, signal=57%  |
| CHIANG_LIVER_CANCER_SUBCLASS_PROLIFERATION_DN      | 174  | -0,7281584  | -2,3703747 | 0         | 0         | 0          | 1994        | tags=45%, list=10%, signal=49% |
| KEGG_COMPLEMENT_AND_COAGULATION_CASCADES           | 68   | -0,83506405 | -2,3547575 | 0         | 0         | 0          | 1377        | tags=51%, list=7%, signal=55%  |
| WOO_LIVER_CANCER_RECURRENCE_DN                     | 79   | -0,8104265  | -2,3431206 | 0         | 0         | 0          | 1691        | tags=54%, list=8%, signal=59%  |
| CAR_IGFBP1                                         | 57   | -0,8416861  | -2,335342  | 0         | 0         | 0          | 1372        | tags=56%, list=7%, signal=60%  |
| KEGG_RETINOL_METABOLISM                            | 56   | -0,8152509  | -2,2632332 | 0         | 0         | 0          | 1346        | tags=32%, list=7%, signal=34%  |
| SERVITJA_ISLET_HNF1A_TARGETS_DN                    | 105  | -0,7348611  | -2,2517767 | 0         | 0         | 0          | 1399        | tags=35%, list=7%, signal=38%  |
| GNF2_CYP2B6                                        | 49   | -0,8281264  | -2,2435067 | 0         | 0         | 0          | 1174        | tags=45%, list=6%, signal=48%  |
| SERVITJA_LIVER_HNF1A_TARGETS_DN                    | 154  | -0,7126978  | -2,2403612 | 0         | 0         | 0          | 1526        | tags=37%, list=8%, signal=40%  |
| V\$HNF1_Q6                                         | 239  | -0,6717297  | -2,2364502 | 0         | 0         | 0          | 1202        | tags=24%, list=6%, signal=26%  |
| HOSHIDA_LIVER_CANCER_SUBCLASS_S3                   | 263  | -0,65341055 | -2,2108023 | 0         | 0         | 0          | 1816        | tags=36%, list=9%, signal=39%  |
| SU_LIVER                                           | 55   | -0,80610263 | -2,2042704 | 0         | 0         | 0          | 1372        | tags=40%, list=7%, signal=43%  |
| REACTOME_FORMATION_OF_FIBRIN_CLOT_CLOTTING_CASCADE | 32   | -0,87470883 | -2,199526  | 0         | 0         | 0          | 719         | tags=44%, list=4%, signal=45%  |
| KEGG_STEROID_HORMONE_BIOSYNTHESIS                  | 47   | -0,820295   | -2,1754558 | 0         | 0         | 0          | 1346        | tags=40%, list=7%, signal=43%  |
| KEGG_DRUG_METABOLISM_CYTOCHROME_P450               | 64   | -0,74764746 | -2,1468518 | 0         | 0         | 0          | 1346        | tags=34%, list=7%, signal=37%  |
| REACTOME_PHASE1_FUNCTIONALIZATION_OF_COMPOUNDS     | 69   | -0,7481085  | -2,137083  | 0         | 0         | 0          | 1472        | tags=30%, list=7%, signal=33%  |
| REACTOME_BIOLOGICAL_OXIDATIONS                     | 129  | -0,6843673  | -2,134809  | 0         | 0         | 0          | 1784        | tags=33%, list=9%, signal=36%  |
| CHR4Q13                                            | 49   | -0,7957459  | -2,1317494 | 0         | 0         | 0          | 1381        | tags=22%, list=7%, signal=24%  |
| BOYALT_LIVER_CANCER_SUBCLASS_G3_DN                 | 51   | -0,7929626  | -2,1311717 | 0         | 0         | 0          | 1498        | tags=41%, list=7%, signal=44%  |
| CHIANG_LIVER_CANCER_SUBCLASS_CTNNB1_UP             | 168  | -0,6603729  | -2,1146398 | 0         | 0         | 0          | 1691        | tags=38%, list=8%, signal=41%  |
| MODULE_172                                         | 94   | -0,7087767  | -2,11412   | 0         | 0         | 0          | 1375        | tags=38%, list=7%, signal=41%  |
| LEE_LIVER_CANCER_ACOX1_DN                          | 63   | -0,74582374 | -2,1113396 | 0         | 0         | 0          | 2020        | tags=49%, list=10%, signal=55% |
| SUMI_HNF4A_TARGETS                                 | 31   | -0,8465868  | -2,100197  | 0         | 2,50E-05  | 0,001      | 761         | tags=55%, list=4%, signal=57%  |
| REACTOME_LIPOPROTEIN_METABOLISM                    | 28   | -0,85197884 | -2,0970247 | 0         | 2,43E-05  | 0,001      | 383         | tags=39%, list=2%, signal=40%  |
| COULOARN_TEMPORAL_TGFB1_SIGNATURE_DN               | 134  | -0,6638792  | -2,0861661 | 0         | 2,36E-05  | 0,001      | 2482        | tags=42%, list=12%, signal=47% |
| MODULE_209                                         | 87   | -0,6989485  | -2,0854492 | 0         | 2,30E-05  | 0,001      | 1375        | tags=39%, list=7%, signal=42%  |
| MODULE_40                                          | 81   | -0,70752865 | -2,0816782 | 0         | 2,24E-05  | 0,001      | 2116        | tags=36%, list=11%, signal=40% |
| REACTOME_REGULATION_OF_BETA_CELL_DEVELOPMENT       | 27   | -0,85083514 | -2,069728  | 0         | 4,39E-05  | 0,002      | 1473        | tags=41%, list=7%, signal=44%  |
| LEE_LIVER_CANCER_CIPROFIBRATE_DN                   | 64   | -0,7315983  | -2,0508535 | 0         | 8,56E-05  | 0,004      | 1526        | tags=38%, list=8%, signal=40%  |
| LUCAS_HNF4A_TARGETS_UP                             | 58   | -0,73900163 | -2,049681  | 0         | 8,36E-05  | 0,004      | 1368        | tags=40%, list=7%, signal=42%  |
| ACEVEDO_LIVER_TUMOR_VS_NORMAL_ADJACENT_TISSUE_DN   | 263  | -0,6109878  | -2,0446548 | 0         | 8,16E-05  | 0,004      | 3132        | tags=40%, list=16%, signal=46% |
| KEGG_METABOLISM_OF_XENOBIOTICS_BY_CYTOCHROME_P450  | 62   | -0,7392671  | -2,042973  | 0         | 7,97E-05  | 0,004      | 1346        | tags=34%, list=7%, signal=36%  |
| BLOOD_COAGULATION                                  | 42   | -0,7778204  | -2,0412366 | 0         | 7,79E-05  | 0,004      | 2081        | tags=40%, list=10%, signal=45% |



|                                                     |     |             |            |   |          |       |      |                                |
|-----------------------------------------------------|-----|-------------|------------|---|----------|-------|------|--------------------------------|
| REACTOME_CYTOCHROME_P450_ARRANGED_BY_SUBSTRATE_TYPE | 50  | -0,7589615  | -2,0384402 | 0 | 9,52E-05 | 0,005 | 1472 | tags=32%, list=7%, signal=34%  |
| CAVARD_LIVER_CANCER_MALIGNANT_VS_BENIGN             | 30  | -0,8342905  | -2,0329576 | 0 | 9,31E-05 | 0,005 | 429  | tags=40%, list=2%, signal=41%  |
| HALLMARK_COAGULATION                                | 138 | -0,6461675  | -2,0317268 | 0 | 9,12E-05 | 0,005 | 1633 | tags=40%, list=8%, signal=43%  |
| CHIANG_LIVER_CANCER_SUBCLASS_INTERFERON_DN          | 50  | -0,7488816  | -2,0315318 | 0 | 8,93E-05 | 0,005 | 1138 | tags=44%, list=6%, signal=47%  |
| COAGULATION                                         | 43  | -0,7723051  | -2,0241187 | 0 | 1,40E-04 | 0,008 | 1498 | tags=35%, list=7%, signal=38%  |
| ZHAN_MULTIPLE_MYELOMA_DN                            | 41  | -0,78584445 | -2,0234628 | 0 | 1,37E-04 | 0,008 | 1423 | tags=27%, list=7%, signal=29%  |
| MODULE_109                                          | 37  | -0,7932153  | -2,021432  | 0 | 1,34E-04 | 0,008 | 799  | tags=38%, list=4%, signal=39%  |
| EXTRACELLULAR_SPACE                                 | 238 | -0,6089458  | -2,020942  | 0 | 1,48E-04 | 0,009 | 1468 | tags=20%, list=7%, signal=22%  |
| LEE_LIVER_CANCER_DENA_DN                            | 73  | -0,69706917 | -2,0152638 | 0 | 1,45E-04 | 0,009 | 1363 | tags=34%, list=7%, signal=37%  |
| KEGG_MATURITY_ONSET_DIABETES_OF_THE_YOUNG           | 23  | -0,8681525  | -2,0148342 | 0 | 1,42E-04 | 0,009 | 1473 | tags=52%, list=7%, signal=56%  |
| CHIANG_LIVER_CANCER_SUBCLASS_UNANNOTATED_UP         | 79  | -0,68702763 | -2,0122488 | 0 | 1,40E-04 | 0,009 | 2493 | tags=33%, list=12%, signal=37% |
| CHRYQ11                                             | 24  | -0,8622386  | -2,0116878 | 0 | 1,37E-04 | 0,009 | 900  | tags=25%, list=4%, signal=26%  |
| STEROID_METABOLIC_PROCESS                           | 71  | -0,7035984  | -2,006378  | 0 | 1,35E-04 | 0,009 | 1896 | tags=37%, list=9%, signal=40%  |
| SERINE_HYDROLASE_ACTIVITY                           | 45  | -0,74967754 | -2,0057976 | 0 | 1,33E-04 | 0,009 | 1727 | tags=31%, list=9%, signal=34%  |
| REACTOME_PLATELET_AGGREGATION_PLUG_FORMATION        | 36  | -0,7812874  | -1,9960127 | 0 | 1,45E-04 | 0,01  | 581  | tags=19%, list=3%, signal=20%  |
| HEMOSTASIS                                          | 47  | -0,7538902  | -1,983364  | 0 | 2,00E-04 | 0,014 | 2197 | tags=38%, list=11%, signal=43% |
| BIOCARTA_INTRINSIC_PATHWAY                          | 23  | -0,83486015 | -1,9826647 | 0 | 1,96E-04 | 0,014 | 284  | tags=48%, list=1%, signal=48%  |
| LEE_LIVER_CANCER_MYC_TGFA_DN                        | 64  | -0,7110937  | -1,9777722 | 0 | 2,62E-04 | 0,019 | 1424 | tags=38%, list=7%, signal=40%  |
| SERINE_TYPE_PEPTIDASE_ACTIVITY                      | 44  | -0,749839   | -1,9701627 | 0 | 2,85E-04 | 0,021 | 1727 | tags=32%, list=9%, signal=35%  |
| YAMASHITA_LIVER_CANCER_STEM_CELL_DN                 | 76  | -0,6837091  | -1,9698523 | 0 | 2,81E-04 | 0,021 | 1802 | tags=50%, list=9%, signal=55%  |
| MODULE_280                                          | 44  | -0,74700236 | -1,9672607 | 0 | 2,90E-04 | 0,022 | 1288 | tags=27%, list=6%, signal=29%  |
| IIZUKA_LIVER_CANCER_PROGRESSION_G2_G3_UP            | 27  | -0,80951446 | -1,9616258 | 0 | 3,49E-04 | 0,027 | 1527 | tags=44%, list=8%, signal=48%  |
| ICHIBA_GRAFT_VERSUS_HOST_DISEASE_35D_DN             | 49  | -0,71906453 | -1,9585825 | 0 | 4,08E-04 | 0,032 | 1529 | tags=33%, list=8%, signal=35%  |
| CAHOY_ASTROCYTIC                                    | 99  | -0,6530977  | -1,958336  | 0 | 4,15E-04 | 0,033 | 1194 | tags=22%, list=6%, signal=24%  |
| ESC_J1_UP_LATE.V1_UP                                | 176 | -0,6087403  | -1,9563848 | 0 | 4,34E-04 | 0,035 | 1446 | tags=32%, list=7%, signal=35%  |
| MODULE_93                                           | 179 | -0,61053425 | -1,9561827 | 0 | 4,27E-04 | 0,035 | 1476 | tags=21%, list=7%, signal=22%  |
| CHR14Q11                                            | 132 | -0,62754583 | -1,9557534 | 0 | 4,34E-04 | 0,036 | 3787 | tags=43%, list=19%, signal=53% |
| ESC_V6.5_UP_LATE.V1_UP                              | 171 | -0,6002555  | -1,9555494 | 0 | 4,27E-04 | 0,036 | 754  | tags=22%, list=4%, signal=22%  |
| MODULE_235                                          | 81  | -0,66868013 | -1,9504397 | 0 | 4,80E-04 | 0,041 | 2288 | tags=38%, list=11%, signal=43% |
| MODULE_107                                          | 77  | -0,6676715  | -1,9480317 | 0 | 5,19E-04 | 0,045 | 1348 | tags=36%, list=7%, signal=39%  |
| EXOPEPTIDASE_ACTIVITY                               | 31  | -0,7869064  | -1,9471925 | 0 | 5,35E-04 | 0,047 | 1616 | tags=29%, list=8%, signal=32%  |
| KONDO_PROSTATE_CANCER_WITH_H3K27ME3                 | 192 | -0,59839565 | -1,9471629 | 0 | 5,28E-04 | 0,047 | 1316 | tags=11%, list=7%, signal=12%  |
| DUTERTRE ESTRADIOL_RESPONSE_24HR_UP                 | 315 | 0,6917961   | 2,486304   | 0 | 0        | 0     | 2372 | tags=60%, list=12%, signal=67% |
| ROSTY_CERVICAL_CANCER_PROLIFERATION_CLUSTER         | 139 | 0,7624695   | 2,4852664  | 0 | 0        | 0     | 2724 | tags=70%, list=14%, signal=80% |
| GSE15750_DAY6_VS_DAY10_TRAF6KO_EFF_CD8_TCELL_UP     | 191 | 0,7232829   | 2,473114   | 0 | 0        | 0     | 2819 | tags=61%, list=14%, signal=71% |
| GNF2_CCNA2                                          | 67  | 0,8343797   | 2,4730728  | 0 | 0        | 0     | 2369 | tags=79%, list=12%, signal=89% |
| SOTIRIOU_BREAST_CANCER_GRADE_1_VS_3_UP              | 147 | 0,7584709   | 2,4729047  | 0 | 0        | 0     | 2935 | tags=64%, list=15%, signal=74% |
| CHANG_CYCLING_GENES                                 | 141 | 0,73290133  | 2,4378781  | 0 | 0        | 0     | 2636 | tags=62%, list=13%, signal=71% |
| GSE15750_DAY6_VS_DAY10_EFF_CD8_TCELL_UP             | 193 | 0,70652604  | 2,4132524  | 0 | 0        | 0     | 2280 | tags=54%, list=11%, signal=61% |
| KONG_E2F3_TARGETS                                   | 95  | 0,7787713   | 2,4023178  | 0 | 0        | 0     | 2461 | tags=65%, list=12%, signal=74% |
| GNF2_RRM1                                           | 87  | 0,7796591   | 2,3969138  | 0 | 0        | 0     | 2233 | tags=59%, list=11%, signal=66% |
| GNF2_PCNA                                           | 67  | 0,81516105  | 2,387705   | 0 | 0        | 0     | 2369 | tags=75%, list=12%, signal=84% |
| PYEON_CANCER_HEAD_AND_NECK_VS_CERVICAL_UP           | 173 | 0,7009693   | 2,3736532  | 0 | 0        | 0     | 2778 | tags=54%, list=14%, signal=62% |
| HALLMARK_E2F_TARGETS                                | 191 | 0,69841295  | 2,3475907  | 0 | 0        | 0     | 3721 | tags=64%, list=19%, signal=78% |
| ZHANG_TLX_TARGETS_UP                                | 84  | 0,75309104  | 2,3388782  | 0 | 0        | 0     | 2291 | tags=70%, list=11%, signal=79% |
| GNF2_SMC4L1                                         | 82  | 0,7701622   | 2,3347073  | 0 | 0        | 0     | 3069 | tags=65%, list=15%, signal=76% |
| GNF2_CENPF                                          | 61  | 0,8072771   | 2,3295014  | 0 | 0        | 0     | 3069 | tags=80%, list=15%, signal=95% |

|                                               |     |            |           |   |   |   |      |                                 |
|-----------------------------------------------|-----|------------|-----------|---|---|---|------|---------------------------------|
| GNF2_CDC2                                     | 61  | 0,8098275  | 2,326205  | 0 | 0 | 0 | 3069 | tags=80%, list=15%, signal=95%  |
| KOBAYASHI_EGFR_SIGNALING_24HR_DN              | 242 | 0,6662867  | 2,3255022 | 0 | 0 | 0 | 2691 | tags=55%, list=13%, signal=63%  |
| GNF2_CCNB2                                    | 56  | 0,81472474 | 2,324234  | 0 | 0 | 0 | 1866 | tags=71%, list=9%, signal=79%   |
| GNF2_CDC20                                    | 55  | 0,8162621  | 2,323976  | 0 | 0 | 0 | 3069 | tags=82%, list=15%, signal=96%  |
| GNF2_RFC4                                     | 59  | 0,79451287 | 2,318092  | 0 | 0 | 0 | 2233 | tags=66%, list=11%, signal=74%  |
| GRAHAM_NORMAL QUIESCENT VS NORMAL DIVIDING_DN | 85  | 0,7422044  | 2,3104448 | 0 | 0 | 0 | 2691 | tags=65%, list=13%, signal=74%  |
| GNF2_FEN1                                     | 55  | 0,8140996  | 2,3052032 | 0 | 0 | 0 | 2233 | tags=67%, list=11%, signal=76%  |
| ZHAN_MULTIPLE_MYELOMA_PR_UP                   | 44  | 0,84615934 | 2,3031518 | 0 | 0 | 0 | 1832 | tags=68%, list=9%, signal=75%   |
| PUJANA_XPRSS_INT_NETWORK                      | 160 | 0,6877427  | 2,303086  | 0 | 0 | 0 | 3524 | tags=59%, list=18%, signal=71%  |
| GNF2_MCM4                                     | 53  | 0,81696784 | 2,303046  | 0 | 0 | 0 | 3069 | tags=81%, list=15%, signal=96%  |
| GNF2_HMMR                                     | 46  | 0,8257336  | 2,2922444 | 0 | 0 | 0 | 1866 | tags=74%, list=9%, signal=81%   |
| RUIZ_TNC_TARGETS_DN                           | 137 | 0,6928864  | 2,2920208 | 0 | 0 | 0 | 2352 | tags=47%, list=12%, signal=53%  |
| BASAKI_YBX1_TARGETS_UP                        | 277 | 0,6465856  | 2,2773166 | 0 | 0 | 0 | 2935 | tags=49%, list=15%, signal=57%  |
| REACTOME_CELL_CYCLE                           | 381 | 0,6210166  | 2,2740698 | 0 | 0 | 0 | 3641 | tags=50%, list=18%, signal=60%  |
| REACTOME_DNA_REPLICATION                      | 181 | 0,6636968  | 2,273592  | 0 | 0 | 0 | 3513 | tags=53%, list=18%, signal=64%  |
| PUJANA_BRCA_CENTERED_NETWORK                  | 114 | 0,7125453  | 2,269872  | 0 | 0 | 0 | 3085 | tags=56%, list=15%, signal=66%  |
| ZHANG_TLX_TARGETS_60HR_DN                     | 264 | 0,63686436 | 2,2615795 | 0 | 0 | 0 | 3062 | tags=56%, list=15%, signal=66%  |
| WHITFIELD_CELL_CYCLE_G1_S                     | 133 | 0,69366056 | 2,2563674 | 0 | 0 | 0 | 3113 | tags=56%, list=16%, signal=65%  |
| GNF2_CKS2                                     | 49  | 0,7977298  | 2,256035  | 0 | 0 | 0 | 1832 | tags=63%, list=9%, signal=69%   |
| GNF2_TTK                                      | 38  | 0,8472715  | 2,2529984 | 0 | 0 | 0 | 3069 | tags=95%, list=15%, signal=112% |
| REACTOME_CHROMOSOME_MAINTENANCE               | 112 | 0,7040509  | 2,2377305 | 0 | 0 | 0 | 3622 | tags=65%, list=18%, signal=79%  |
| MISSIAGLIA_REGULATED_BY_METHYLATION_DN        | 114 | 0,70240897 | 2,2310767 | 0 | 0 | 0 | 3387 | tags=59%, list=17%, signal=70%  |
| REACTOME_MITOTIC_PROMETAPHASE                 | 86  | 0,71806604 | 2,225502  | 0 | 0 | 0 | 3513 | tags=59%, list=18%, signal=72%  |
| MODULE_54                                     | 257 | 0,6255082  | 2,2214375 | 0 | 0 | 0 | 2738 | tags=51%, list=14%, signal=58%  |
| GNF2_BUB1B                                    | 49  | 0,8119712  | 2,2190492 | 0 | 0 | 0 | 2372 | tags=71%, list=12%, signal=81%  |
| LEE_EARLY_T_LYMPHOCYTE_UP                     | 98  | 0,7064498  | 2,218211  | 0 | 0 | 0 | 2071 | tags=55%, list=10%, signal=61%  |
| CROONQUIST_NRAS_SIGNALING_DN                  | 71  | 0,75077355 | 2,2180734 | 0 | 0 | 0 | 4178 | tags=82%, list=21%, signal=103% |
| WHITFIELD_CELL_CYCLE_S                        | 148 | 0,6649231  | 2,2106705 | 0 | 0 | 0 | 2769 | tags=53%, list=14%, signal=61%  |
| ZHOU_CELL_CYCLE_GENES_IN_IR_RESPONSE_24HR     | 124 | 0,69303405 | 2,2103035 | 0 | 0 | 0 | 3150 | tags=63%, list=16%, signal=74%  |
| PUJANA_BRCA2_PCC_NETWORK                      | 407 | 0,6062187  | 2,2088754 | 0 | 0 | 0 | 3524 | tags=47%, list=18%, signal=56%  |
| KANG_DOXORUBICIN_RESISTANCE_UP                | 53  | 0,7819401  | 2,199376  | 0 | 0 | 0 | 2691 | tags=72%, list=13%, signal=83%  |
| GRAHAM_CML_DIVIDING VS NORMAL QUIESCENT_UP    | 176 | 0,6514625  | 2,1920369 | 0 | 0 | 0 | 2691 | tags=48%, list=13%, signal=55%  |
| KAUFFMANN_MELANOMA_RELAPSE_UP                 | 57  | 0,75921124 | 2,1906793 | 0 | 0 | 0 | 3797 | tags=79%, list=19%, signal=97%  |
| GNF2_RRM2                                     | 39  | 0,8228133  | 2,190278  | 0 | 0 | 0 | 2164 | tags=74%, list=11%, signal=83%  |
| REACTOME_CELL_CYCLE_MITOTIC                   | 296 | 0,61743397 | 2,1869044 | 0 | 0 | 0 | 3641 | tags=49%, list=18%, signal=59%  |
| MORI_LARGE_PRE_BII_LYMPHOCYTE_UP              | 84  | 0,71142    | 2,1827993 | 0 | 0 | 0 | 3217 | tags=56%, list=16%, signal=66%  |
| FERREIRA_EWINGS_SARCOMA_UNSTABLE VS STABLE_UP | 163 | 0,65204215 | 2,181116  | 0 | 0 | 0 | 3049 | tags=48%, list=15%, signal=56%  |
| ZHOU_CELL_CYCLE_GENES_IN_IR_RESPONSE_6HR      | 83  | 0,71642536 | 2,1734047 | 0 | 0 | 0 | 2637 | tags=69%, list=13%, signal=79%  |
| ISHIDA_E2F_TARGETS                            | 52  | 0,7806304  | 2,1705883 | 0 | 0 | 0 | 2233 | tags=63%, list=11%, signal=71%  |
| HALLMARK_G2M_CHECKPOINT                       | 191 | 0,6343775  | 2,1685627 | 0 | 0 | 0 | 3541 | tags=52%, list=18%, signal=63%  |
| MODULE_125                                    | 41  | 0,7872572  | 2,1635118 | 0 | 0 | 0 | 3622 | tags=85%, list=18%, signal=104% |
| GNF2_ESPL1                                    | 35  | 0,8339714  | 2,1610467 | 0 | 0 | 0 | 3069 | tags=89%, list=15%, signal=104% |
| CROONQUIST_IL6_DEPRIVATION_DN                 | 96  | 0,6898783  | 2,1596212 | 0 | 0 | 0 | 3622 | tags=73%, list=18%, signal=89%  |
| WINNEPENINCKX_MELANOMA_METASTASIS_UP          | 157 | 0,6464272  | 2,1594985 | 0 | 0 | 0 | 2268 | tags=45%, list=11%, signal=51%  |
| REACTOME_MITOTIC_M_M_G1_PHASES                | 161 | 0,6497497  | 2,158652  | 0 | 0 | 0 | 3513 | tags=52%, list=18%, signal=62%  |
| GNF2_CENPE                                    | 40  | 0,8077438  | 2,1583965 | 0 | 0 | 0 | 3069 | tags=80%, list=15%, signal=94%  |
| MODULE_158                                    | 40  | 0,7912699  | 2,1479478 | 0 | 0 | 0 | 3309 | tags=80%, list=17%, signal=96%  |
| GNF2_RFC3                                     | 40  | 0,80318165 | 2,1413867 | 0 | 0 | 0 | 2214 | tags=65%, list=11%, signal=73%  |

|                                                                           |     |            |           |   |          |       |      |                                 |
|---------------------------------------------------------------------------|-----|------------|-----------|---|----------|-------|------|---------------------------------|
| WU_APOPTOSIS_BY_CDKN1A_VIA_TP53                                           | 52  | 0,7583867  | 2,1376994 | 0 | 0        | 0     | 2369 | tags=62%, list=12%, signal=70%  |
| ZHANG_TLX_TARGETS_36HR_DN                                                 | 174 | 0,641358   | 2,136574  | 0 | 0        | 0     | 3540 | tags=60%, list=18%, signal=72%  |
| BENPORATH_PROLIFERATION                                                   | 143 | 0,6429572  | 2,1312232 | 0 | 0        | 0     | 3858 | tags=62%, list=19%, signal=77%  |
| FRASOR_RESPONSE_TO_SERM_OR_FULVESTRANT_DN                                 | 49  | 0,74729747 | 2,1178951 | 0 | 1,77E-05 | 0,001 | 3055 | tags=67%, list=15%, signal=79%  |
| REN_BOUND_BY_E2F                                                          | 59  | 0,74397874 | 2,1166155 | 0 | 3,53E-05 | 0,002 | 3614 | tags=76%, list=18%, signal=93%  |
| STEIN_ESRRA_TARGETS_RESPONSIVE_TO_ESTROGEN_DN                             | 41  | 0,8044296  | 2,1160629 | 0 | 3,48E-05 | 0,002 | 2636 | tags=66%, list=13%, signal=76%  |
| GSE24634_TEFF_VS_TCONV_DAY7_IN_CULTURE_UP                                 | 195 | 0,6226167  | 2,1159556 | 0 | 3,43E-05 | 0,002 | 3519 | tags=52%, list=18%, signal=62%  |
| SHEDDEN_LUNG_CANCER_POOR_SURVIVAL_A6                                      | 444 | 0,57340264 | 2,1145852 | 0 | 3,38E-05 | 0,002 | 3541 | tags=45%, list=18%, signal=54%  |
| GNF2_CKS1B                                                                | 37  | 0,79219073 | 2,110269  | 0 | 3,33E-05 | 0,002 | 2935 | tags=68%, list=15%, signal=79%  |
| GSE36476_CTRL_VS_TSST_ACT_72H_MEMORY_CD4_TCELL_YOUNG_DN                   | 194 | 0,6181239  | 2,108073  | 0 | 3,29E-05 | 0,002 | 3541 | tags=55%, list=18%, signal=66%  |
| GNF2_SMC2L1                                                               | 32  | 0,8284759  | 2,1075385 | 0 | 3,24E-05 | 0,002 | 3069 | tags=91%, list=15%, signal=107% |
| REACTOME_TELOMERE_MAINTENANCE                                             | 72  | 0,7083104  | 2,099143  | 0 | 3,20E-05 | 0,002 | 3932 | tags=72%, list=20%, signal=90%  |
| KAUFFMANN_DNA_REPAIR_GENES                                                | 220 | 0,6057437  | 2,0972955 | 0 | 3,16E-05 | 0,002 | 3649 | tags=47%, list=18%, signal=57%  |
| FARMER_BREAST_CANCER_CLUSTER_2                                            | 33  | 0,81017816 | 2,0920348 | 0 | 3,12E-05 | 0,002 | 2578 | tags=79%, list=13%, signal=90%  |
| RHODES_UNDIFFERENTIATED_CANCER                                            | 67  | 0,7105781  | 2,0903919 | 0 | 3,08E-05 | 0,002 | 3309 | tags=55%, list=17%, signal=66%  |
| NADERI_BREAST_CANCER_PROGNOSIS_UP                                         | 50  | 0,73980063 | 2,0871153 | 0 | 3,04E-05 | 0,002 | 2459 | tags=54%, list=12%, signal=61%  |
| GSE30962_PRIMARY_VS_SECONDARY_ACUTE_LCMV_INF_CD8_TCELL_UP                 | 196 | 0,60984117 | 2,0870917 | 0 | 3,00E-05 | 0,002 | 2844 | tags=49%, list=14%, signal=57%  |
| SONG_TARGETS_OF_IE86_CMV_PROTEIN                                          | 58  | 0,7233464  | 2,0735993 | 0 | 5,93E-05 | 0,004 | 3111 | tags=66%, list=16%, signal=77%  |
| REACTOME_ACTIVATION_OF_THE_PRE_REPLICATIVE_COMPLEX                        | 23  | 0,8531888  | 2,072939  | 0 | 5,85E-05 | 0,004 | 2258 | tags=91%, list=11%, signal=103% |
| GNF2_H2AFX                                                                | 30  | 0,80945647 | 2,0722835 | 0 | 5,78E-05 | 0,004 | 3069 | tags=77%, list=15%, signal=90%  |
| PUJANA_BREAST_CANCER_WITH_BRCA1_MUTATED_UP                                | 52  | 0,7309945  | 2,0722783 | 0 | 5,71E-05 | 0,004 | 3051 | tags=71%, list=15%, signal=84%  |
| GNF2_BUB1                                                                 | 26  | 0,85009503 | 2,061894  | 0 | 7,04E-05 | 0,005 | 2691 | tags=88%, list=13%, signal=102% |
| CHICAS_RB1_TARGETS_GROWING                                                | 235 | 0,60011584 | 2,059875  | 0 | 6,96E-05 | 0,005 | 2224 | tags=46%, list=11%, signal=51%  |
| EGUCHI_CELL_CYCLE_RB1_TARGETS                                             | 23  | 0,85704434 | 2,0551212 | 0 | 6,88E-05 | 0,005 | 2233 | tags=87%, list=11%, signal=98%  |
| MORI_IMMATURE_B_LYMPHOCYTE_DN                                             | 87  | 0,67707175 | 2,055107  | 0 | 6,80E-05 | 0,005 | 3069 | tags=55%, list=15%, signal=65%  |
| GREENBAUM_E2A_TARGETS_UP                                                  | 33  | 0,7877247  | 2,0507402 | 0 | 6,73E-05 | 0,005 | 1866 | tags=55%, list=9%, signal=60%   |
| GNF2_MCM5                                                                 | 58  | 0,70801383 | 2,048269  | 0 | 6,65E-05 | 0,005 | 3663 | tags=57%, list=18%, signal=69%  |
| REACTOME_DEPOSITION_OF_NEW_CENPA_CONTAINING_NUCLEOSOMES_AT_THE_CENTROMERE | 57  | 0,7211916  | 2,0440392 | 0 | 6,58E-05 | 0,005 | 3932 | tags=77%, list=20%, signal=96%  |
| VERNELL_RETINOBLASTOMA_PATHWAY_UP                                         | 69  | 0,6806404  | 2,041346  | 0 | 6,51E-05 | 0,005 | 3663 | tags=70%, list=18%, signal=85%  |
| CHR18Q21                                                                  | 77  | 0,67318034 | 2,0339878 | 0 | 8,96E-05 | 0,007 | 3247 | tags=47%, list=16%, signal=56%  |
| YU_MYC_TARGETS_UP                                                         | 41  | 0,753539   | 2,0308    | 0 | 8,87E-05 | 0,007 | 3721 | tags=68%, list=19%, signal=84%  |
| MARKEY_RB1_ACUTE_LOF_DN                                                   | 219 | 0,5816713  | 2,0270572 | 0 | 8,77E-05 | 0,007 | 3387 | tags=46%, list=17%, signal=55%  |
| KAUFFMANN_DNA_REPLICATION_GENES                                           | 135 | 0,6182577  | 2,026068  | 0 | 8,68E-05 | 0,007 | 3797 | tags=49%, list=19%, signal=60%  |
| WHITFIELD_CELL_CYCLE_G2                                                   | 170 | 0,59635717 | 2,0223694 | 0 | 9,82E-05 | 0,008 | 3129 | tags=44%, list=16%, signal=51%  |
| REACTOME_DNA_STRAND_ELONGATION                                            | 29  | 0,8104022  | 2,019993  | 0 | 9,72E-05 | 0,008 | 3622 | tags=93%, list=18%, signal=114% |
| GNF2_MKI67                                                                | 27  | 0,81130487 | 2,0196621 | 0 | 9,62E-05 | 0,008 | 1581 | tags=70%, list=8%, signal=76%   |
| MOLENAAR_TARGETS_OF_CCND1_AND_CDK4_DN                                     | 56  | 0,69964415 | 2,013272  | 0 | 9,52E-05 | 0,008 | 2669 | tags=71%, list=13%, signal=82%  |
| MODULE_403                                                                | 44  | 0,74029666 | 2,0128918 | 0 | 9,43E-05 | 0,008 | 3503 | tags=73%, list=18%, signal=88%  |
| TANG_SENESCENCE_TP53_TARGETS_DN                                           | 55  | 0,7100634  | 2,0124357 | 0 | 9,33E-05 | 0,008 | 3145 | tags=71%, list=16%, signal=84%  |
| CHR5P13                                                                   | 46  | 0,7222294  | 2,0092008 | 0 | 1,61E-04 | 0,014 | 1936 | tags=48%, list=10%, signal=53%  |
| WHITFIELD_CELL_CYCLE_LITERATURE                                           | 42  | 0,7411932  | 2,005866  | 0 | 1,60E-04 | 0,014 | 3069 | tags=60%, list=15%, signal=70%  |
| NAKAYAMA_SOFT_TISSUE_TUMORS_PCA2_UP                                       | 86  | 0,6490785  | 2,005475  | 0 | 1,58E-04 | 0,014 | 2809 | tags=51%, list=14%, signal=59%  |
| TOYOTA_TARGETS_OF_MIR34B_AND_MIR34C                                       | 418 | 0,5446545  | 2,004331  | 0 | 1,57E-04 | 0,014 | 3721 | tags=42%, list=19%, signal=51%  |
| FUJII_YBX1_TARGETS_DN                                                     | 199 | 0,5893885  | 2,0021698 | 0 | 1,55E-04 | 0,014 | 2687 | tags=46%, list=13%, signal=52%  |
| GSE36476_CTRL_VS_TSST_ACT_40H_MEMORY_CD4_TCELL_YOUNG_DN                   | 195 | 0,5895264  | 1,9974505 | 0 | 1,65E-04 | 0,015 | 3309 | tags=48%, list=17%, signal=57%  |
| REACTOME_G2_M_CHECKPOINTS                                                 | 33  | 0,7891561  | 1,9925712 | 0 | 1,74E-04 | 0,016 | 3541 | tags=88%, list=18%, signal=107% |
| VECCHI_GASTRIC_CANCER_EARLY_UP                                            | 404 | 0,5451752  | 1,99179   | 0 | 1,73E-04 | 0,016 | 2459 | tags=36%, list=12%, signal=40%  |
| REICHERT_MITOSIS_LIN9_TARGETS                                             | 27  | 0,8055816  | 1,9865597 | 0 | 1,93E-04 | 0,018 | 1656 | tags=63%, list=8%, signal=69%   |

|                                                              |     |            |           |   |          |       |      |                                 |
|--------------------------------------------------------------|-----|------------|-----------|---|----------|-------|------|---------------------------------|
| SARRIO_EPITHELIAL_MESENCHYMAL_TRANSITION_UP                  | 168 | 0,59520465 | 1,9843497 | 0 | 1,91E-04 | 0,018 | 2218 | tags=45%, list=11%, signal=50%  |
| CHR11Q22                                                     | 50  | 0,70816123 | 1,9808456 | 0 | 2,21E-04 | 0,021 | 3595 | tags=44%, list=18%, signal=54%  |
| GNF2_HAT1                                                    | 47  | 0,71651393 | 1,9805115 | 0 | 2,19E-04 | 0,021 | 2461 | tags=45%, list=12%, signal=51%  |
| CHARAFE_BREAST_CANCER_LUMINAL_VS_MESENCHYMAL_DN              | 448 | 0,5390391  | 1,9801952 | 0 | 2,28E-04 | 0,022 | 2253 | tags=32%, list=11%, signal=35%  |
| MODULE_320                                                   | 19  | 0,85668194 | 1,9769638 | 0 | 2,56E-04 | 0,025 | 1981 | tags=74%, list=10%, signal=82%  |
| REACTOME_EXTENSION_OF_TELOMERES                              | 27  | 0,78860384 | 1,9761571 | 0 | 2,54E-04 | 0,025 | 3622 | tags=78%, list=18%, signal=95%  |
| REACTOME_ACTIVATION_OF_ATR_IN_RESPONSE_TO_REPLICATION_STRESS | 28  | 0,7844834  | 1,9758263 | 0 | 2,52E-04 | 0,025 | 3797 | tags=89%, list=19%, signal=110% |
| DNA_REPLICATION                                              | 93  | 0,639767   | 1,9749557 | 0 | 2,50E-04 | 0,025 | 2372 | tags=39%, list=12%, signal=44%  |
| MORF_BUB1                                                    | 50  | 0,71406925 | 1,9700975 | 0 | 2,77E-04 | 0,028 | 3644 | tags=58%, list=18%, signal=71%  |
| KEGG_DNA_REPLICATION                                         | 36  | 0,7329825  | 1,968363  | 0 | 2,95E-04 | 0,03  | 3309 | tags=75%, list=17%, signal=90%  |
| KEGG_CELL_CYCLE                                              | 115 | 0,60934556 | 1,9654233 | 0 | 3,02E-04 | 0,031 | 4388 | tags=58%, list=22%, signal=74%  |
| HORIUCHI_WTAP_TARGETS_DN                                     | 298 | 0,5454231  | 1,9630828 | 0 | 3,19E-04 | 0,033 | 3245 | tags=42%, list=16%, signal=49%  |
| AMUNDSON_GAMMA_RADIATION_RESPONSE                            | 39  | 0,7352462  | 1,9558483 | 0 | 3,92E-04 | 0,041 | 2935 | tags=64%, list=15%, signal=75%  |
| REACTOME_DNA_REPAIR                                          | 104 | 0,62272805 | 1,9549669 | 0 | 3,89E-04 | 0,041 | 3472 | tags=47%, list=17%, signal=57%  |
| HOFFMANN_LARGE_TO_SMALL_PRE_BII_LYMPHOCYTE_UP                | 156 | 0,59020585 | 1,9480788 | 0 | 4,05E-04 | 0,043 | 2291 | tags=42%, list=11%, signal=47%  |

**Supplementary table 2.** Uni- and multivariable Cox regression analysis on known clinical variables in the NCI data set. Global Risk Score groups: GRS I = low GRS in tumor and liver; GRS II = low GRS in tumor, high in liver; GRS III = high GRS in tumor, low in liver; GRS IV = high GRS in tumor and liver.

|                                        | Disease free survival     |              |        |        |                             |              |        |        | Overall survival          |              |        |        |                             |              |        |         |
|----------------------------------------|---------------------------|--------------|--------|--------|-----------------------------|--------------|--------|--------|---------------------------|--------------|--------|--------|-----------------------------|--------------|--------|---------|
|                                        | Univariate cox regression |              |        |        | Multivariate cox regression |              |        |        | Univariate cox regression |              |        |        | Multivariate cox regression |              |        |         |
|                                        | p-value                   | Hazard Ratio | 95% CI |        | p-value                     | Hazard Ratio | 95% CI |        | p-value                   | Hazard Ratio | 95% CI |        | p-value                     | Hazard Ratio | 95% CI |         |
|                                        |                           | Lower        | Upper  |        |                             | Lower        | Upper  |        |                           | Lower        | Upper  |        |                             | Lower        | Upper  |         |
| Gender (female vs male)                | <b>,017</b>               | ,436         | ,221   | ,860   | ,083                        | ,544         | ,273   | 1,082  | ,110                      | ,533         | ,246   | 1,153  |                             |              |        |         |
| Age                                    | ,968                      | 1,000        | ,984   | 1,016  |                             |              |        |        | ,254                      | ,989         | ,970   | 1,008  |                             |              |        |         |
| Hepatitis B status (AVR vs no AVR)     | ,257                      | 1,263        | ,843   | 1,893  |                             |              |        |        | ,318                      | 1,281        | ,788   | 2,081  |                             |              |        |         |
| ALT (> 50 IU/l vs < 50 IU/l)           | ,082                      | 1,363        | ,961   | 1,933  |                             |              |        |        | ,627                      | 1,110        | ,729   | 1,690  |                             |              |        |         |
| Size largest nodule (> 5 cm vs < 5 cm) | ,067                      | 1,398        | ,977   | 2,001  |                             |              |        |        | <b>,003</b>               | 1,870        | 1,229  | 2,844  | ,715                        | ,900         | ,513   | 1,580   |
| Multinodular (no vs yes)               | ,072                      | ,682         | ,450   | 1,034  |                             |              |        |        | <b>,010</b>               | ,542         | ,341   | ,861   | ,145                        | 1,785        | ,819   | 3,888   |
| Cirrhosis (yes vs no)                  | ,183                      | 1,678        | ,783   | 3,596  |                             |              |        |        | <b>,039</b>               | 4,365        | 1,074  | 17,736 | ,060                        | 3,941        | ,945   | 16,434  |
| BCLC                                   | <b>,000</b>               |              |        |        | <b>,000</b>                 |              |        |        | <b>,000</b>               |              |        |        | <b>,000</b>                 |              |        |         |
| BCLC (A vs 0)                          | ,092                      | 2,043        | ,889   | 4,695  | ,045                        | 2,381        | 1,021  | 5,552  | ,059                      | 3,923        | ,952   | 16,162 | ,035                        | 4,648        | 1,113  | 19,403  |
| BCLC (B vs 0)                          | ,002                      | 4,506        | 1,751  | 11,594 | ,002                        | 4,564        | 1,749  | 11,915 | ,002                      | 10,186       | 2,289  | 45,325 | ,002                        | 14,850       | 2,597  | 84,908  |
| BCLC (C vs 0)                          | ,000                      | 6,930        | 2,782  | 17,264 | ,000                        | 6,744        | 2,640  | 17,224 | ,000                      | 18,429       | 4,272  | 79,492 | ,000                        | 23,956       | 4,850  | 118,331 |
| aFP (> 300 ng/ml vs < 300 ng/ml)       | ,089                      | 1,354        | ,955   | 1,920  |                             |              |        |        | ,006                      | 1,807        | 1,185  | 2,756  | ,410                        | 1,228        | ,754   | 2,001   |
| Global Risk Score group                | <b>,001</b>               |              |        |        | <b>,007</b>                 |              |        |        | <b>,001</b>               |              |        |        | <b>,024</b>                 |              |        |         |
| GRS II vs I                            | ,009                      | 2,050        | 1,196  | 3,514  | ,002                        | 2,458        | 1,380  | 4,377  | ,036                      | 2,011        | 1,045  | 3,871  | ,025                        | 2,315        | 1,112  | 4,820   |
| GRS III vs I                           | ,102                      | 1,533        | ,919   | 2,556  | ,033                        | 1,810        | 1,048  | 3,127  | ,263                      | 1,436        | ,762   | 2,706  | ,086                        | 1,848        | ,916   | 3,730   |
| GRS IV vs I                            | ,000                      | 2,647        | 1,612  | 4,344  | ,002                        | 2,372        | 1,378  | 4,083  | ,000                      | 3,072        | 1,697  | 5,559  | ,003                        | 2,870        | 1,446  | 5,696   |
